# Supplementary material
Source: PubMed Central journal article supplement (PMC4338501)
Supplement: NIHMS58243-supplement-1.pdf [file NIHMS58243-supplement-1.pdf]

## Supplementary Figure 1

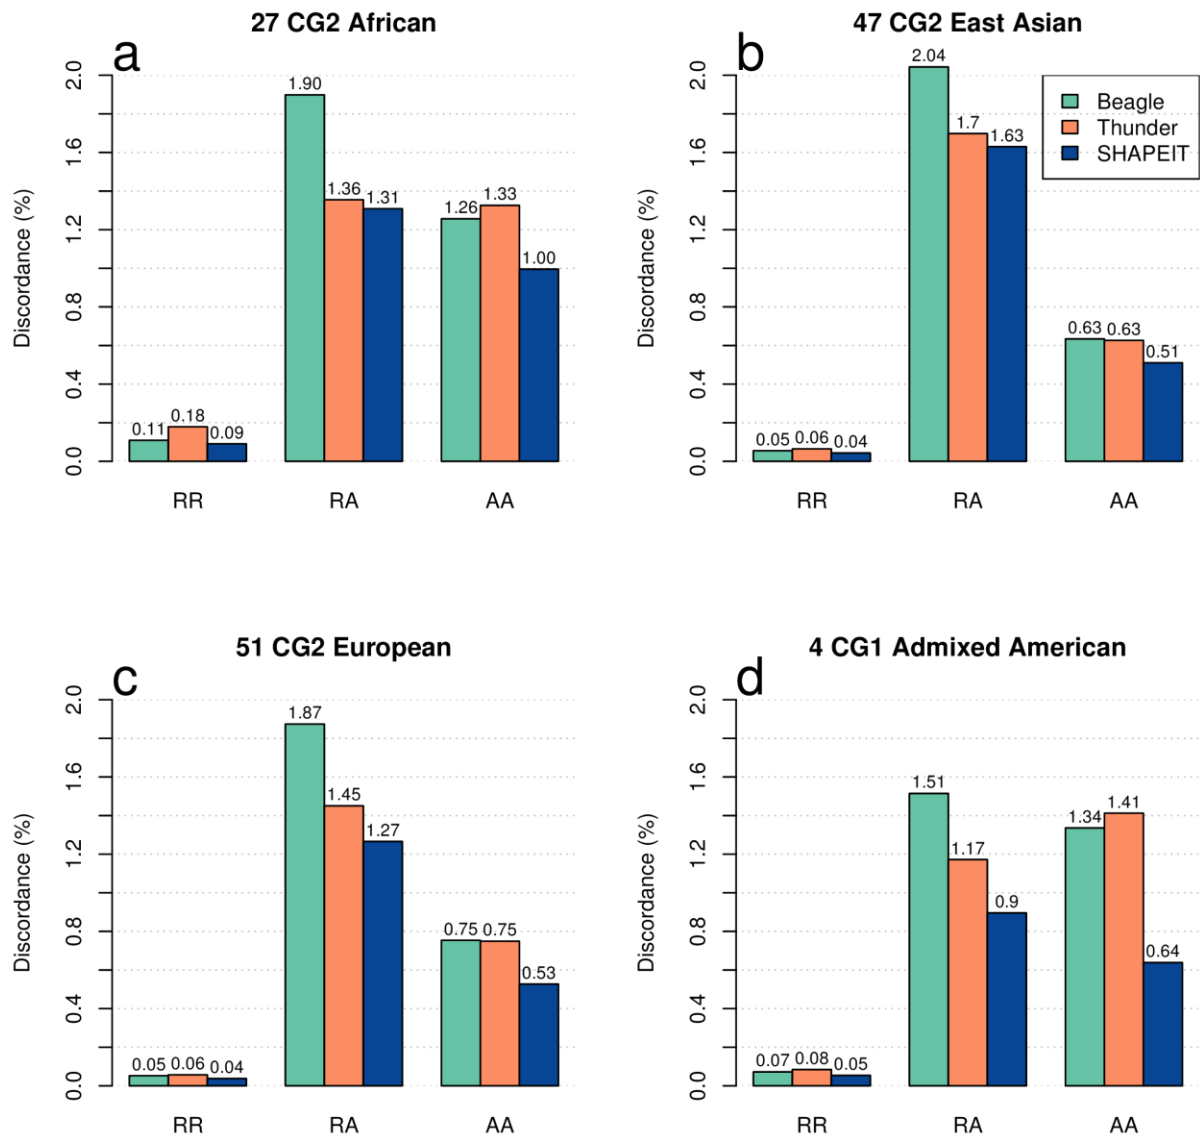

**Genotype discordance by continental group.** Genotype discordance of the Beagle, Thunder and SHAPEIT2 call sets at SNP genotypes in (a) 27 CG2 African samples, (b) 47 CG2 East Asian samples, (c) 51 CG2 European samples and (d) 4 CG1 Admixed American samples. RR, RA and AA stand for Reference/Reference, Reference/Alternative and Alternative/Alternative genotypes, respectively.

## Supplementary Figure 2

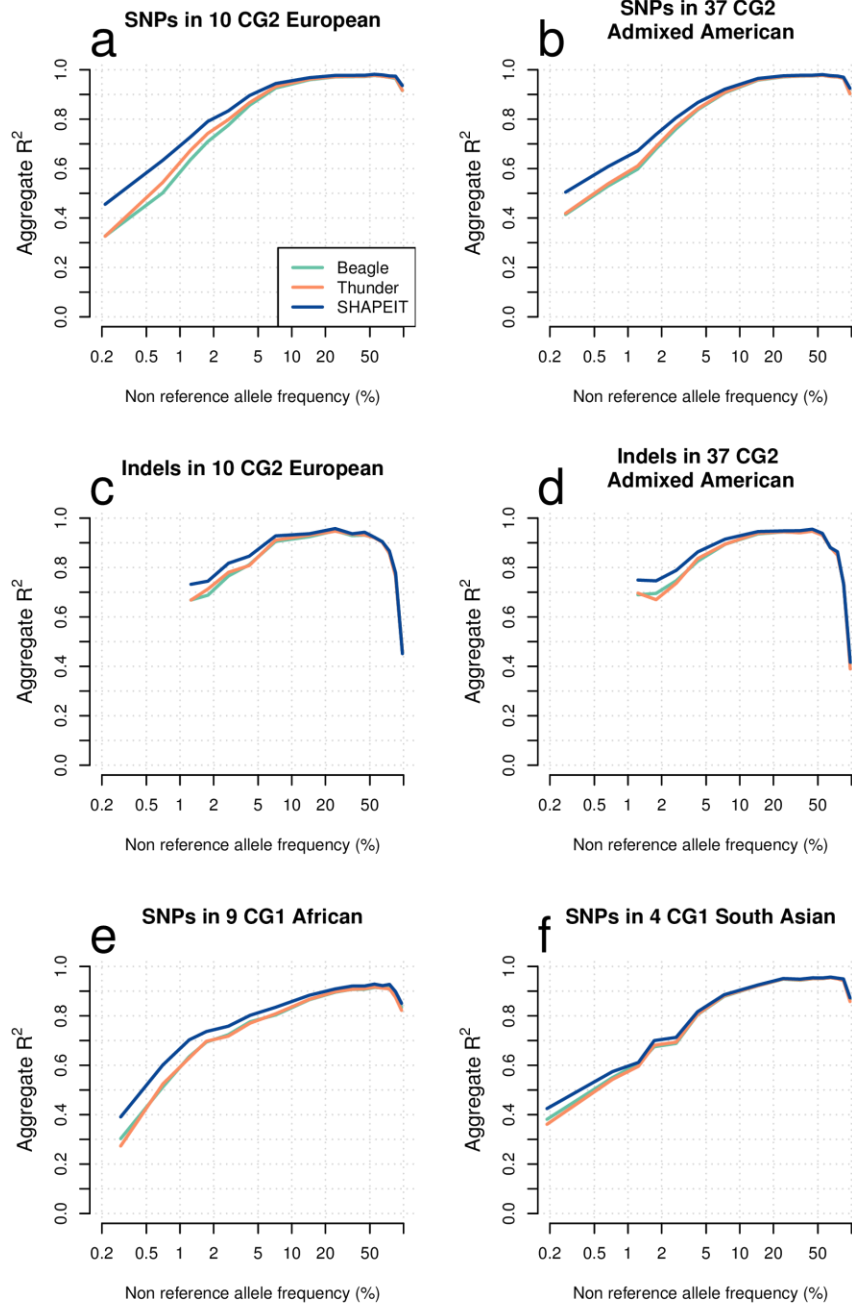

**Imputation performance by continental group.** Imputation performance of the Beagle, Thunder and SHAPEIT2 call sets to impute SNPs and indels in various continental groups genotyped on Illumina 1M: (a) SNPs in 10 CG2 European samples, (b) SNPs in 37 CG2 Admixed American samples, (c) Indels in 10 CG2 European samples, (d) Indels in 37 CG2 Admixed American samples, (e) SNPs in 9 CG1 African samples and (f) SNPs in 4 CG1 South Asian samples. Imputation accuracy is measured as the aggregate squared correlation coefficient and plotted against the non-reference allele frequency.

### Supplementary Figure 3

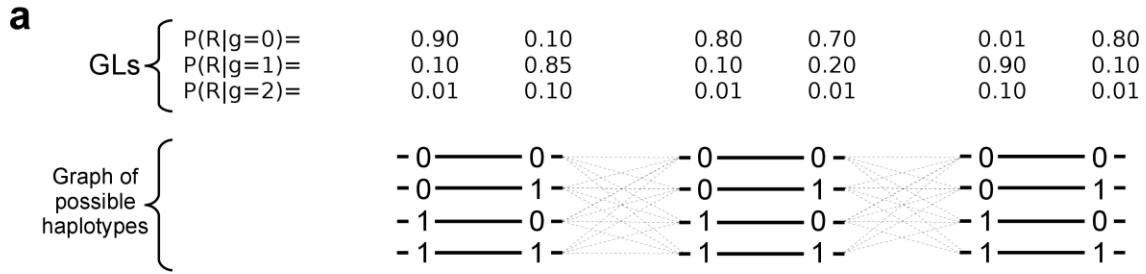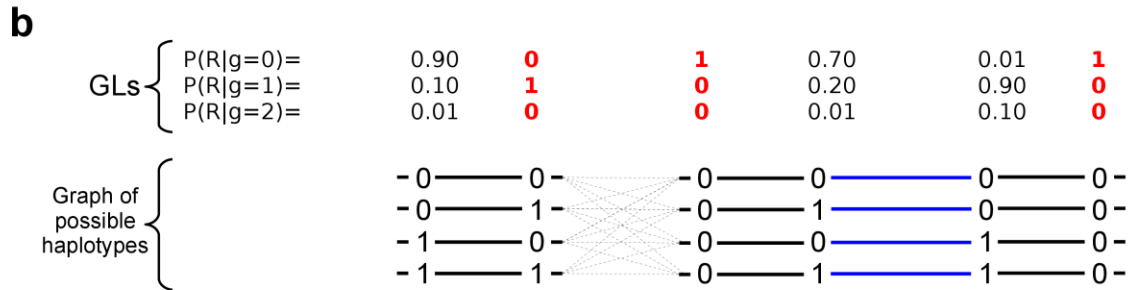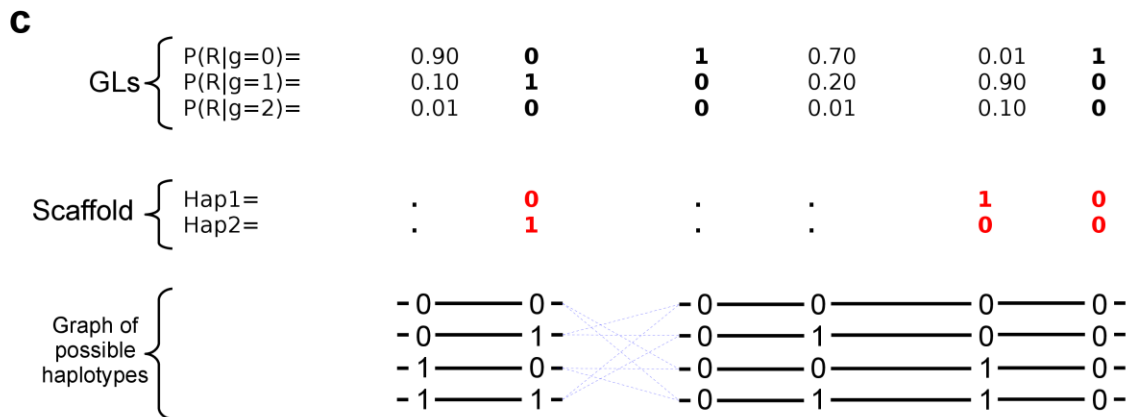

**Illustration of the 3 levels of our model.** Panel (a) shows an example of possible haplotype graph that can be derived from a vector of genotype likelihoods. The segments contains few SNPs in order to limit the number of possible haplotypes they contain. Panel (b) illustrates what happens to the situation in A when some of the genotypes are initialised using the Beagle posteriors (in red): the segments contain more sites (in blue). Panel (c) illustrates what happens to the situation in B when a haplotype scaffold is used (in red): some of the transitions inconsistent with the scaffold are discarded (leaving just those in blue).

## Supplementary Figure 4

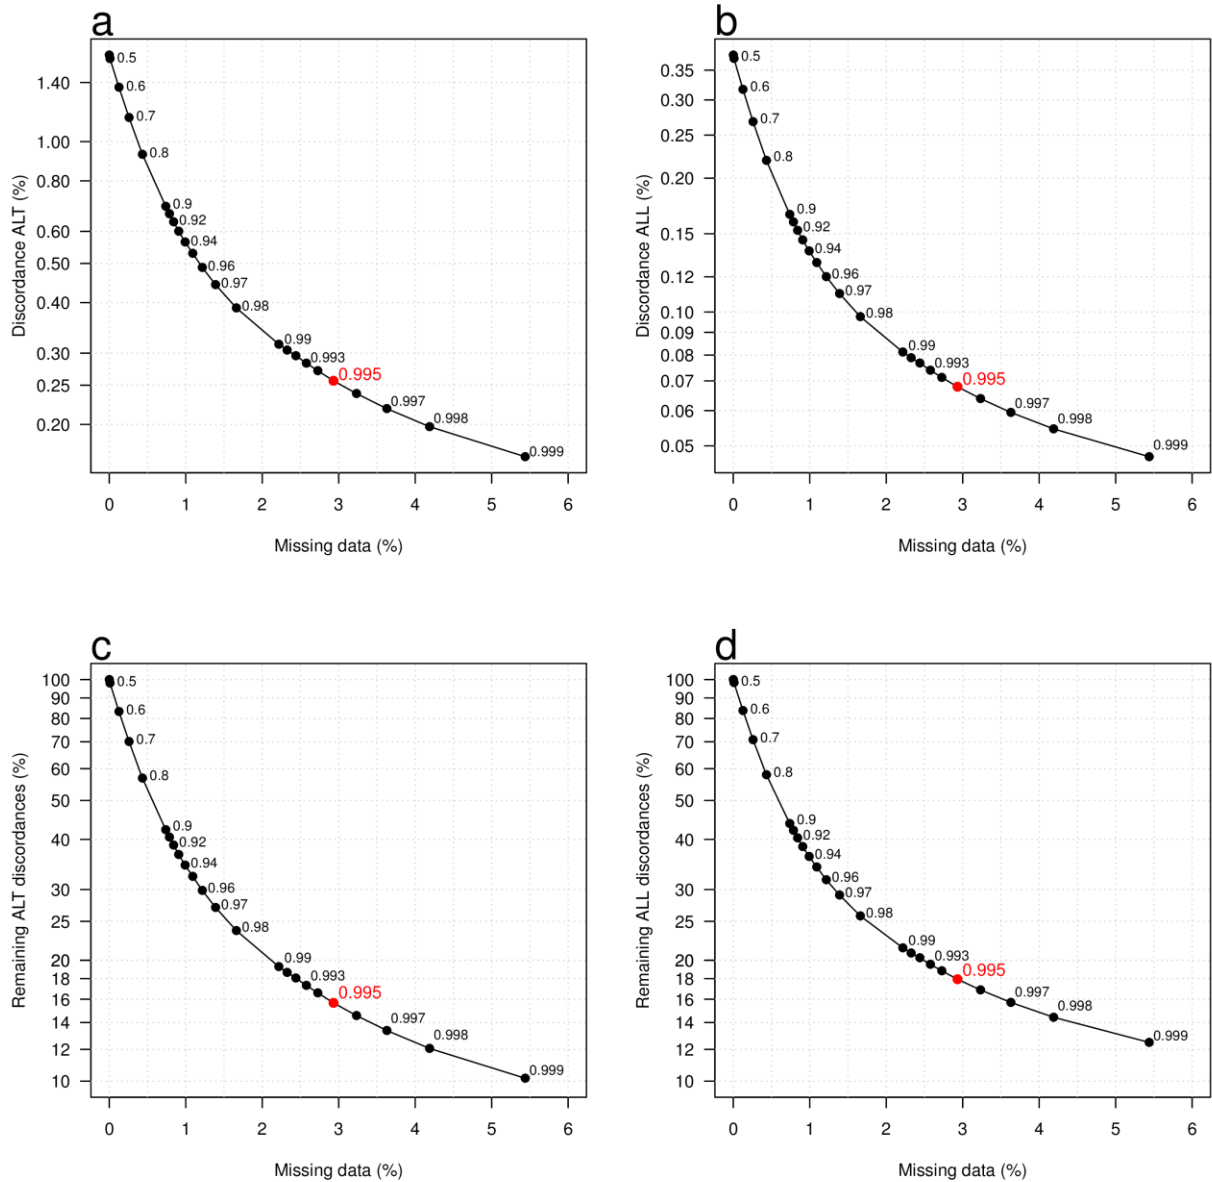

**Calibration of Beagle posterior probabilities.** Plots (a) and (b) give for several threshold values the ALT and ALL discordance rates as a function of the proportion of genotypes discarded by a given threshold. For example, the points highlighted in red show that using a threshold of 0.995 on the Beagle posteriors, we discard 3% of the genotypes and the remaining 97% have ALT and ALL discordance rates of  $\sim 0.25\%$  and  $\sim 0.07\%$  respectively. Panels (c) and (d) give similar information but this time the proportion of genotypes discarded by a given threshold is plotted against the percentage of the overall discordance accounted for by the genotypes passing the filter. For example, the two red points show that using a threshold of 0.995 on the Beagle posteriors, we discard 3% of the genotypes and the remaining 97% contain only  $\sim 16\%$  and  $\sim 18\%$  of the ALT and ALL discordances contained in the full call set.

## Supplementary Figure 5

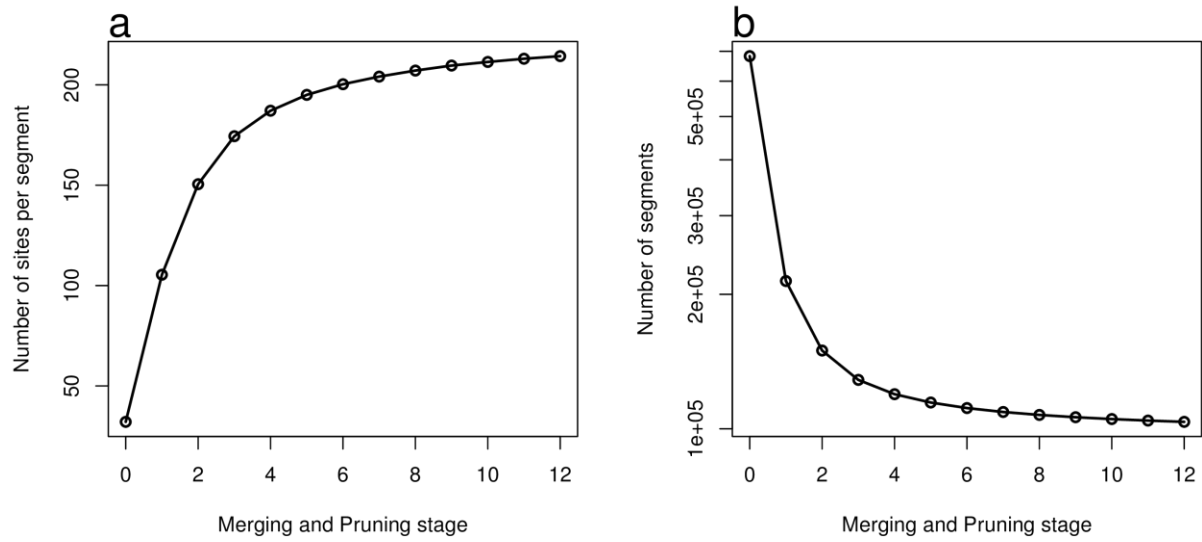

**Convergence of the SHAPEIT2 MCMC algorithm.** Plot (a) shows the average number of sites per segment (y-axis) as the number of merging and pruning stages increases (x-axis). Plot (b) shows the total number of segments as the number of pruning and merging stages increases (x-axis). A value of 0 for the pruning and merging stage gives the initial number before any iteration.

## Supplementary Table 1

| Population | OMNI | 1000GP | 1000GP phased as Unrelated | 1000GP phased as Duo | 1000GP phased as Trio |
|------------|------|--------|----------------------------|----------------------|-----------------------|
| ACB        | 102  | 0      | 0                          | 0                    | 0                     |
| ASW        | 97   | 61     | 17                         | 22                   | 22                    |
| CDX        | 100  | 0      | 0                          | 0                    | 0                     |
| CEU        | 104  | 85     | 83                         | 0                    | 2                     |
| CHB        | 100  | 97     | 97                         | 0                    | 0                     |
| CHD        | 1    | 0      | 0                          | 0                    | 0                     |
| CHS        | 150  | 100    | 0                          | 0                    | 100                   |
| CLM        | 107  | 60     | 1                          | 1                    | 58                    |
| FIN        | 100  | 93     | 93                         | 0                    | 0                     |
| GBR        | 101  | 89     | 88                         | 1                    | 0                     |
| GIH        | 100  | 0      | 0                          | 0                    | 0                     |
| IBS        | 150  | 14     | 0                          | 0                    | 14                    |
| JPT        | 100  | 89     | 89                         | 0                    | 0                     |
| KHV        | 121  | 0      | 0                          | 0                    | 0                     |
| LWK        | 100  | 97     | 97                         | 0                    | 0                     |
| MKK        | 31   | 0      | 0                          | 0                    | 0                     |
| MXL        | 100  | 66     | 10                         | 0                    | 56                    |
| PEL        | 105  | 0      | 0                          | 0                    | 0                     |
| PUR        | 111  | 55     | 0                          | 0                    | 55                    |
| TSI        | 100  | 98     | 98                         | 0                    | 0                     |
| YRI        | 161  | 88     | 3                          | 12                   | 73                    |
| Total      | 2141 | 1092   | 676                        | 36                   | 380                   |

**Number of 1000GP and OMNI samples per population.** The first column gives the population acronym. The second and third columns give the numbers of OMNI and 1000GP samples respectively per population. The fourth, fifth and sixth columns give the number of 1000GP samples that are phased as unrelated or as part of a duo or a trio when phased in OMNI.

## Supplementary Table 2

| Population | Group | TGP1 | CG1 – TGP1 | CG1 $\cap$ TGP1 | CG2 – TGP1 | CG2 $\cap$ TGP1 |
|------------|-------|------|------------|-----------------|------------|-----------------|
| ASW        | AFR   | 61   | 0          | 5               | 0          | 0               |
| LWK        | AFR   | 97   | 3          | 1               | 0          | 8               |
| MKK        | AFR   | 0    | 4          | 0               | 0          | 0               |
| YRI        | AFR   | 98   | 2          | 7               | 2          | 19              |
| CLM        | AMR   | 60   | 0          | 0               | 0          | 0               |
| MXL        | AMR   | 66   | 3          | 2               | 0          | 0               |
| PEL        | AMR   | 0    | 0          | 0               | 37         | 0               |
| PUR        | AMR   | 55   | 0          | 2               | 0          | 0               |
| CHB        | ASN   | 97   | 0          | 4               | 0          | 0               |
| CHS        | ASN   | 100  | 0          | 0               | 0          | 47              |
| GIH        | ASN   | 0    | 4          | 0               | 0          | 0               |
| JPT        | ASN   | 89   | 0          | 4               | 0          | 0               |
| PJL        | ASN   | 0    | 0          | 0               | 2          | 0               |
| CEU        | EUR   | 85   | 3          | 6               | 10         | 51              |
| FIN        | EUR   | 93   | 0          | 0               | 0          | 0               |
| GBR        | EUR   | 89   | 0          | 0               | 0          | 0               |
| IBS        | EUR   | 14   | 0          | 0               | 0          | 0               |
| TSI        | EUR   | 98   | 1          | 3               | 0          | 0               |

**Number of CG1, CG2 and 1000GP samples per population and continental group.** The first and second columns give the population and the continental groups. The third column gives the number of 1000GP samples per population. The fourth and sixth columns give the numbers per population of CG1 and CG2 samples not in 1000GP. These individuals are used to carry out imputation experiments using the call sets. The fifth and seventh columns give the numbers per population of CG1 and CG2 samples also included in 1000GP. These individuals are used to carry out discordance analysis of the call sets.

### Supplementary Table 3

| Set              | Type  | Chr 10    | Chr 20  | Chr 1-22   |
|------------------|-------|-----------|---------|------------|
| TGP1             | SNP   | 1,814,147 | 824,953 | 36,820,992 |
| TGP1             | Indel | 68,118    | 30,010  | 1,389,601  |
| CGI1 $\cap$ TGP1 | SNP   | 747,042   | 341,674 | 15,060,295 |
| CGI2 $\cap$ TGP1 | SNP   | 867,976   | 399,477 | 17,399,956 |
| CGI2 $\cap$ TGP1 | Indel | 27,511    | 12,751  | 554,886    |

**Number of SNPs and Indels in common between 1000GP, CG1 and CG2.**
